# Supplementary material
Source: Royal Society of Chemistry journal article supplement (doi:10.1039/d6cp00844e)
Supplement: d6cp00844e1.pdf [file d6cp00844e1.pdf]

## Supplementary Information

### Tuning ORR on Graphene-MN<sub>4</sub> Single-Atom Sites via 2D TMD Coupling

Yue Dong, Zheng-Zhe Lin\*

*School of Physics, Xidian University, Xi'an 710071, China*

\* Corresponding Author. E-mail address: zzlin@xidian.edu.cn

#### 1. The comparison of PBE and r<sup>2</sup>SCAN functionals

To ensure the reliability of the chosen exchange-correlation functional, we performed benchmark calculations comparing the standard GGA functional (PBE-D4) with the more advanced meta-GGA functional (r<sup>2</sup>SCAN-rVV10) on a representative system, including pristine FeN<sub>4</sub>, CoN<sub>4</sub>, MnN<sub>4</sub>, and typical coupled systems such as FeN<sub>4</sub>@WSe<sub>2</sub> and CoN<sub>4</sub>@WSe<sub>2</sub>. The calculation Gibbs free energies for ORR are plotted in **Fig. S1**. Although r<sup>2</sup>SCAN-rVV10 predicts slightly weaker binding strengths for the ORR intermediates compared to PBE-D4, the overall reaction trends and the determination of the potential-limiting step remain unchanged. This consistency confirms that the PBE-D4 functional captures the essential physics of these systems and provides robust energetic descriptions for the catalytic mechanism. Therefore, subsequent mechanism analyses in this work are based on the PBE-D4 results with lower computational costs.

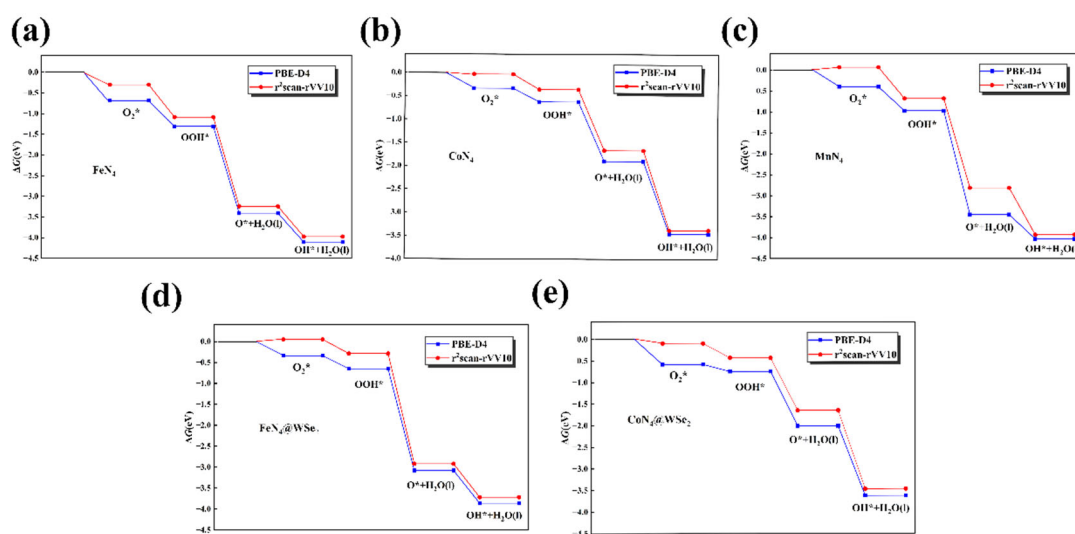

**Fig. S1** Comparison of ORR Gibbs free energy diagrams calculated using PBE-D4 and r<sup>2</sup>SCAN-RVV10 for (a) FeN<sub>4</sub>, (b) CoN<sub>4</sub>, (c) MnN<sub>4</sub>, (d) FeN<sub>4</sub>@WSe<sub>2</sub>, and (e) CoN<sub>4</sub>@WSe<sub>2</sub>.

**Table S1** Comparison of Adsorption Free Energies  $\Delta G$ 

| FeN <sub>4</sub> | $\Delta G$ (PBE-D4) | $\Delta G$ (r <sup>2</sup> SCAN-rVV10) |
|------------------|---------------------|----------------------------------------|
| O <sub>2</sub> * | -0.68               | -0.30                                  |
| OOH*             | -1.30               | -1.08                                  |
| O*               | -3.40               | -3.24                                  |
| OH*              | -4.10               | -3.97                                  |

  

| CoN <sub>4</sub> | $\Delta G$ (PBE-D4) | $\Delta G$ (r <sup>2</sup> SCAN-rVV10) |
|------------------|---------------------|----------------------------------------|
| O <sub>2</sub> * | -0.33               | -0.03                                  |
| OOH*             | -0.62               | -0.35                                  |
| O*               | -1.89               | -1.66                                  |
| OH*              | -3.45               | -3.37                                  |

  

| MnN <sub>4</sub> | $\Delta G$ (PBE-D4) | $\Delta G$ (r <sup>2</sup> SCAN-rVV10) |
|------------------|---------------------|----------------------------------------|
| O <sub>2</sub> * | -0.39               | 0.06                                   |
| OOH*             | -0.96               | -0.67                                  |
| O*               | -3.45               | -2.81                                  |
| OH*              | -4.03               | -3.93                                  |

  

| FeN <sub>4</sub> @WSe <sub>2</sub> | $\Delta G$ (PBE-D4) | $\Delta G$ (r <sup>2</sup> SCAN-rVV10) |
|------------------------------------|---------------------|----------------------------------------|
| O <sub>2</sub> *                   | -0.33               | 0.05                                   |
| OOH*                               | -0.64               | -0.28                                  |
| O*                                 | -3.07               | -2.91                                  |
| OH*                                | -3.85               | -3.71                                  |

  

| CoN <sub>4</sub> @WSe <sub>2</sub> | $\Delta G$ (PBE-D4) | $\Delta G$ (r <sup>2</sup> SCAN-rVV10) |
|------------------------------------|---------------------|----------------------------------------|
| O <sub>2</sub> *                   | -0.58               | -0.09                                  |
| OOH*                               | -0.74               | -0.43                                  |
| O*                                 | -2.00               | -1.64                                  |
| OH*                                | -3.62               | -3.46                                  |

The use of r<sup>2</sup>SCAN-rVV10 serves as an important cross-validation of the PBE-D4 results. Although the free energies differ slightly, the consistent energetic trends across intermediates confirm the robustness of the computational predictions. These benchmark comparisons justify the use of PBE-D4 for large-scale screening across MN<sub>4</sub>@RX<sub>2</sub> systems in the main text.

## 2. The adsorption energy of 3d transition metal atoms on the graphene-N<sub>4</sub> skeleton

To evaluate the stability of the MN<sub>4</sub> single-atom configurations, two complementary stability descriptors were considered, including the adsorption energy relative to isolated metal atoms and the formation energy referenced to bulk metal phases.

First, the anchoring stability of individual metal atoms (Sc, Ti, V, Cr, Mn, Fe, and Co) on the graphene-N<sub>4</sub> framework was evaluated using the adsorption energy, defined as

$$E_{\text{ad}}(\text{M}) = E(\text{graphene-MN}_4) - E(\text{graphene-N}_4) - E(\text{M})$$

where,  $E(\text{graphene-MN}_4)$ ,  $E(\text{graphene-N}_4)$ , and  $E(\text{M})$  represent the total energies of the MN<sub>4</sub> structure, the pristine graphene-N<sub>4</sub> substrate, and an isolated metal atom, respectively. As summarized in **Table S2**, all calculated adsorption energies are strongly negative, indicating that the metal atoms can be firmly anchored at the N<sub>4</sub> coordination sites. Among them, TiN<sub>4</sub> and ScN<sub>4</sub> exhibit the strongest metal-substrate interactions, suggesting excellent anchoring stability.

**Table S2** The adsorption energy of metal atoms on the graphene-N<sub>4</sub> skeleton.

|                      | Sc    | Ti    | V     | Cr    | Mn    | Fe    | Co    |
|----------------------|-------|-------|-------|-------|-------|-------|-------|
| $E_{\text{ad}}$ (eV) | -8.41 | -8.48 | -7.77 | -6.92 | -6.65 | -7.86 | -8.03 |

Furthermore, to assess the thermodynamic stability of the single-atom configurations against metal aggregation, the formation energies referenced to bulk metal phases ( $E_{\text{form}}$ ) were additionally calculated:

$$E_{\text{form}}(\text{M}) = E(\text{graphene-MN}_4) - E(\text{graphene-N}_4) - \mu_{\text{M}}^{\text{bulk}}$$

where  $\mu_{\text{M}}^{\text{bulk}}$  represents the chemical potential of the corresponding bulk metal (Note: The thermodynamically stable phase of Mn is  $\alpha$ -Mn. However, due to highly complex crystal structure, the bcc phase was adopted as the reference structure.). The calculated results in **Table S3** show that all MN<sub>4</sub> systems possess negative formation energies

relative to bulk metals, indicating that the isolated metal centers are thermodynamically favored over aggregation into metallic clusters.

Overall, the isolated-atom adsorption energies and bulk-referenced formation energies consistently demonstrate the robust stability of the MN<sub>4</sub> single-atom configurations, confirming both strong anchoring ability and favorable anti-clustering characteristics.

**Table S3** Formation energies of MN<sub>4</sub> structures relative to bulk metal phases.

|                        | Sc (hcp) | Ti (hcp) | V (bcc) | Cr (bcc) | Mn (bcc) | Fe (bcc) | Co (hcp) |
|------------------------|----------|----------|---------|----------|----------|----------|----------|
| $E_{\text{form}}$ (eV) | -3.74    | -2.75    | -2.09   | -2.43    | -2.85    | -2.65    | -2.09    |

### 3. ORR Gibbs free energy of transition metals on N<sub>4</sub> skeleton

The Gibbs free energy ( $\Delta G$ ) of each reaction intermediate involved in ORR was calculated using the computational hydrogen electrode model. The corresponding reaction steps include O<sub>2</sub>\*, OOH\*, O\*, and OH\* intermediates.

$$\Delta G = \Delta E + \Delta E_{\text{ZPE}} - T\Delta S + eU + \Delta G_{\text{pH}}$$

where  $\Delta E$ ,  $\Delta E_{\text{ZPE}}$ , and  $\Delta S$  are the changes of total energy, zero-point energy, and entropy, respectively;  $T = 298.15$  K;  $eU$  represents the electrode potential correction, and  $\Delta G_{\text{pH}} = k_{\text{B}}T \ln 10 \times \text{pH}$  accounts for the pH correction (pH = 0 in this work). The calculated values (**Table S4**) reveal that FeN<sub>4</sub>, CoN<sub>4</sub>, and MnN<sub>4</sub> exhibit more favorable free energy steps closer to the ideal thermodynamic pathway, suggesting superior ORR catalytic activity compared with ScN<sub>4</sub>, TiN<sub>4</sub>, and CrN<sub>4</sub>.

**Table S4** Gibbs free energy of 3d transition metal atoms related to ORR on the graphene-N<sub>4</sub> skeleton.

|                                | Sc    | Ti    | V     | Cr    | Mn    | Fe    | Co    |
|--------------------------------|-------|-------|-------|-------|-------|-------|-------|
| $\Delta G(\text{O}_2^*)$       | -2.81 | -3.05 | -2.76 | -1.26 | -0.63 | -0.68 | -0.46 |
| $\Delta G(\text{OOH}^*)$       | -4.99 | -4.41 | -4.22 | -6.65 | -1.50 | -1.30 | -0.87 |
| $\Delta G(\text{O}^*)$         | -     | -6.72 | -6.58 | -     | -3.55 | -3.40 | -2.15 |
| $\Delta G(\text{OH}^*)$        | -     | -6.92 | -6.12 | -     | -4.19 | -4.10 | -3.66 |
| $\Delta G(\text{H}_2\text{O})$ | -     | -4.92 | -4.92 | -     | -4.92 | -4.92 | -4.92 |



**Table S6** ORR Overpotential on MN<sub>4</sub> and MN<sub>4</sub>@RX<sub>2</sub>.

| @                | -    | MoS <sub>2</sub> | MoSe <sub>2</sub> | MoTe <sub>2</sub> | MoSSe | WS <sub>2</sub> | WSe <sub>2</sub> | WTe <sub>2</sub> | WSSe |
|------------------|------|------------------|-------------------|-------------------|-------|-----------------|------------------|------------------|------|
| FeN <sub>4</sub> | 0.53 | 0.54             | 0.43              | 0.48              | 0.53  | 0.49            | 0.38             | 0.51             | 0.55 |
| CoN <sub>4</sub> | 0.35 | 0.49             | 0.30              | 0.31              | 0.38  | 0.34            | 0.22             | 0.33             | 0.33 |
| MnN <sub>4</sub> | 0.58 | 0.43             | 0.49              | 0.58              | 0.48  | 0.50            | 0.54             | 0.59             | 0.60 |

### 5. Molecular dynamics simulations for FeN<sub>4</sub>@WSe<sub>2</sub> and CoN<sub>4</sub>@WSe<sub>2</sub>

To verify the thermal stabilities of FeN<sub>4</sub>@WSe<sub>2</sub> and CoN<sub>4</sub>@WSe<sub>2</sub>, molecular dynamics (MD) simulations were performed at 300 K. The Nosé-Hoover thermostat was employed to control the temperature.

The results for FeN<sub>4</sub>@WSe<sub>2</sub> are shown in **Fig. S2(a)**. The simulation time step is set 0.5 fs. The total energy exhibits reasonable fluctuations around the average value, indicating that the system has reached equilibrium. During the simulation process, the FeN<sub>4</sub> group continuously deviates from its original position and then moves back. Root mean square displacement (RMSD)

$$\text{RMSD} = \sqrt{\frac{\sum |\vec{r}_i - \vec{r}_{i0}|^2}{N}}$$

shows reasonable fluctuations, indicating that the system is stable.

The results for CoN<sub>4</sub>@WSe<sub>2</sub> are shown in **Fig. S2(b)**. Due to the relatively flat potential energy surface in the *xy*-plane, the simulation time step is set 0.2 fs to avoid errors. During the simulation process, CoN<sub>4</sub> with its graphene framework continuously drifts in the *xy*-plane, while its distance to WSe<sub>2</sub> substrate in the *z* direction keeps fluctuating. Root mean square displacement of the *z* direction (*z*-RMSD)

$$\text{z-RMSD} = \sqrt{\frac{\sum |z_i - z_{i0}|^2}{N}}$$

shows reasonable fluctuations, indicating that the graphene-WSe<sub>2</sub> interlayer distance is stable. Our simulation model is small. For real large graphene covering on WSe<sub>2</sub>, the interlayer binding, which is proportional to its area, is large enough to compete with the

t  
r  
a

$\frac{1}{2}kT$  in the  $xy$ -plane.

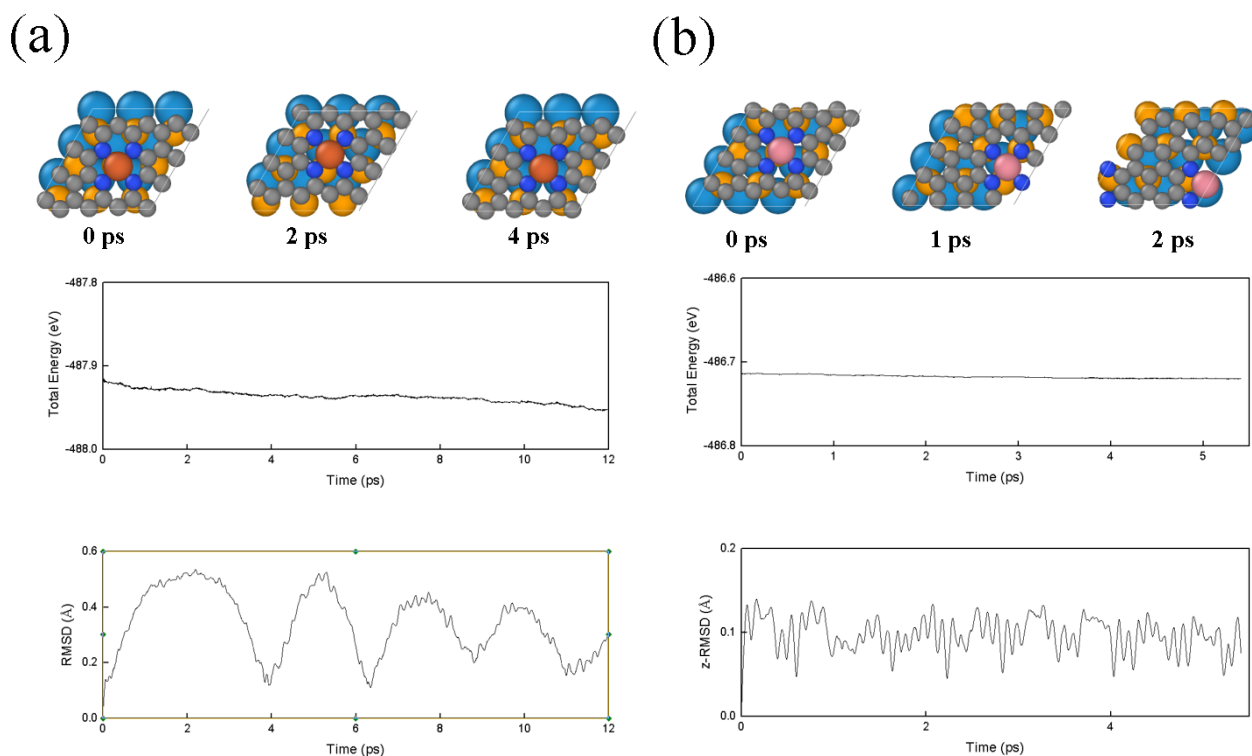

**Fig. S2** MD simulations for (a) FeN<sub>4</sub>@WSe<sub>2</sub>, and (b) CoN<sub>4</sub>@WSe<sub>2</sub>.

## 6. Key elementary step and reaction barrier

$O_2^* + H^+ + e^- \rightarrow OOH^*$  is a suggested key step of common ORR. In the report of *J. Am. Chem. Soc.* **145**, 25352–25356 (2023), the step  $O_2 + * \rightarrow O_2^*$  was found to be rate-limiting step. In aqueous environment, one H<sub>2</sub>O molecule pre-coordinates with Fe. In the beginning of ORR, O<sub>2</sub> should conquer the barrier to replace H<sub>2</sub>O. To reveal the barrier of key elementary step of ORR on MN<sub>4</sub>@RX<sub>2</sub>, climbing image nudged elastic band method was employed. Explicit water model was built by setting several H<sub>2</sub>O molecules around MN<sub>4</sub>. As an example, FeN<sub>4</sub>@WSe<sub>2</sub> was studied to compare with FeN<sub>4</sub>.

In aqueous environment, one H<sub>2</sub>O coordinates with Fe and occupies the catalytic site. During O<sub>2</sub> adsorption, the H<sub>2</sub>O molecule is replaced (see **Fig. S3(a)**). On pristine FeN<sub>4</sub>, the barrier of the step  $O_2 + * \rightarrow O_2^*$  is 0.96 eV. In FeN<sub>4</sub>@WSe<sub>2</sub>, the electrons of the Fe center are slightly taken away by the WSe<sub>2</sub> substrate, which benefits O<sub>2</sub> adsorption. **Fig. S3(b)** plots the energy profile of O<sub>2</sub> adsorption on pristine FeN<sub>4</sub> and

FeN<sub>4</sub>@WSe<sub>2</sub>. On FeN<sub>4</sub>@WSe<sub>2</sub>, the barrier of the step  $O_2 + * \rightarrow O_2^*$  is 0.54 eV, which is lower than that on pristine FeN<sub>4</sub>.

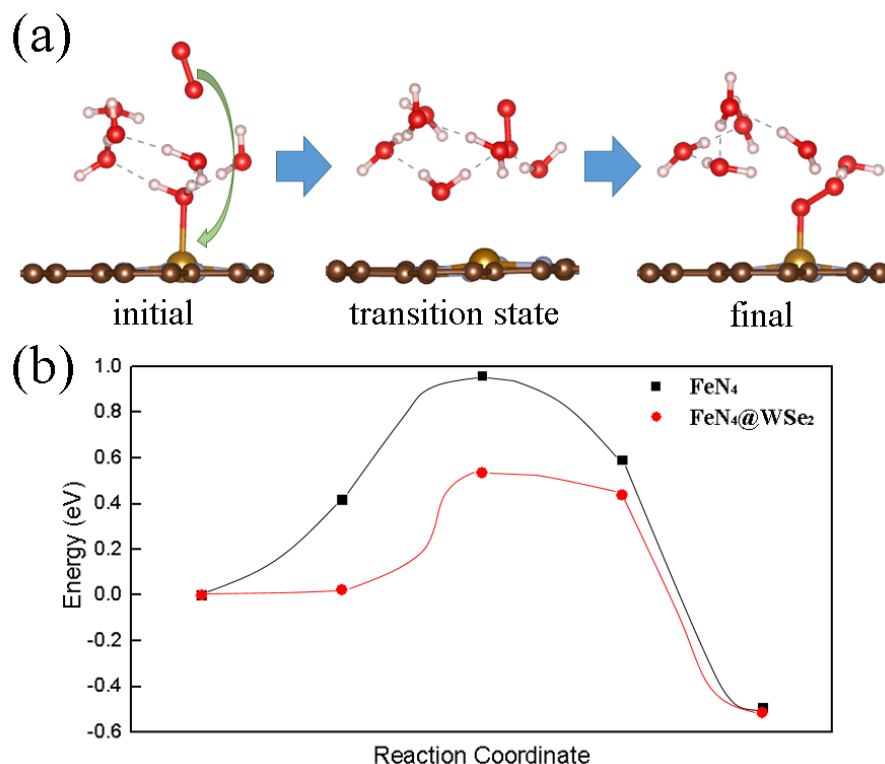

**Fig. S3** (a) The structure evolution and (b) energy profile of O<sub>2</sub> adsorption on pristine FeN<sub>4</sub> and FeN<sub>4</sub>@WSe<sub>2</sub> in water environment.

To investigate the  $O_2^* + H^+ + e^- \rightarrow OOH^*$  step on FeN<sub>4</sub>, we note that the FeN<sub>4</sub> site is unstable under acidic conditions but stabilized in alkaline environments. Therefore, we studied the corresponding alkaline reaction  $O_2^* + H_2O + e^- \rightarrow OOH^* + OH^-$ . In this process, the OH<sup>-</sup> product is stabilized by hydrogen bonding with surrounding water molecules. The proton from H<sub>2</sub>O is transferred to the adsorbed O<sub>2</sub><sup>\*</sup> via a proton relay chain ( $O_2^* \cdots (H_2O)_n \cdots H_2O \rightarrow OOH^* \cdots (H_2O)_n \cdots OH^-$ ), resulting in the formation of OH<sup>-</sup> at a distal water molecule. **Fig. S4(a)** shows the structures of initial, transition and final states (the arrows show the proton transfer). **Fig. S4(b)** plots the energy profile of  $O_2^* + H_2O + e^- \rightarrow OOH^* + OH^-$  on pristine FeN<sub>4</sub> and FeN<sub>4</sub>@WSe<sub>2</sub>. On FeN<sub>4</sub>@WSe<sub>2</sub>, the barrier is 0.15 eV, which is lower than that on pristine FeN<sub>4</sub> (0.27 eV).

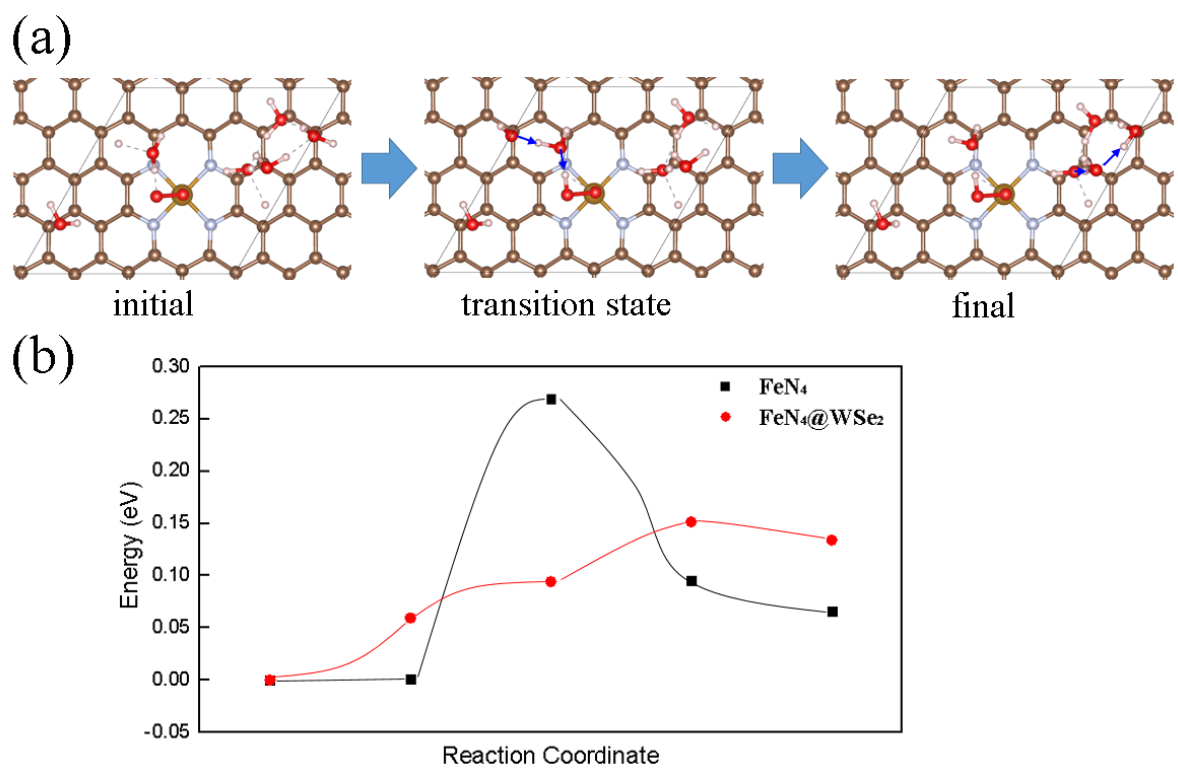

**Fig. S4** (a) The structure evolution and (b) energy profile of  $\text{O}_2^* + \text{H}_2\text{O} + \text{e}^- \rightarrow \text{OOH}^* + \text{OH}^-$  on pristine  $\text{FeN}_4$  and  $\text{FeN}_4@\text{WSe}_2$  in water environment.
